# Supplementary material for: Fast retrieval and autonomous regulation of single spontaneously recycling synaptic vesicles
Source: eLife journal article supplement (doi:10.7554/elife.03658), 2014-11-21
Supplement: supp [file elife-03658-supp-v1.zip]

Archive with 2 entries (2 files):
- elife_poa_e03658_Figure_3_figure_supplement_1.pdf
- elife_poa_e03658_Figure_4_figure_supplement_1.pdf
