# Supplementary material for: Fast retrieval and autonomous regulation of single spontaneously recycling synaptic vesicles
Source: eLife journal article supplement (doi:10.7554/elife.03658), 2014-11-21
Supplement: supp [file elife-03658-supp-v1.zip › elife_poa_e03658_Figure_3_figure_supplement_1.pdf]

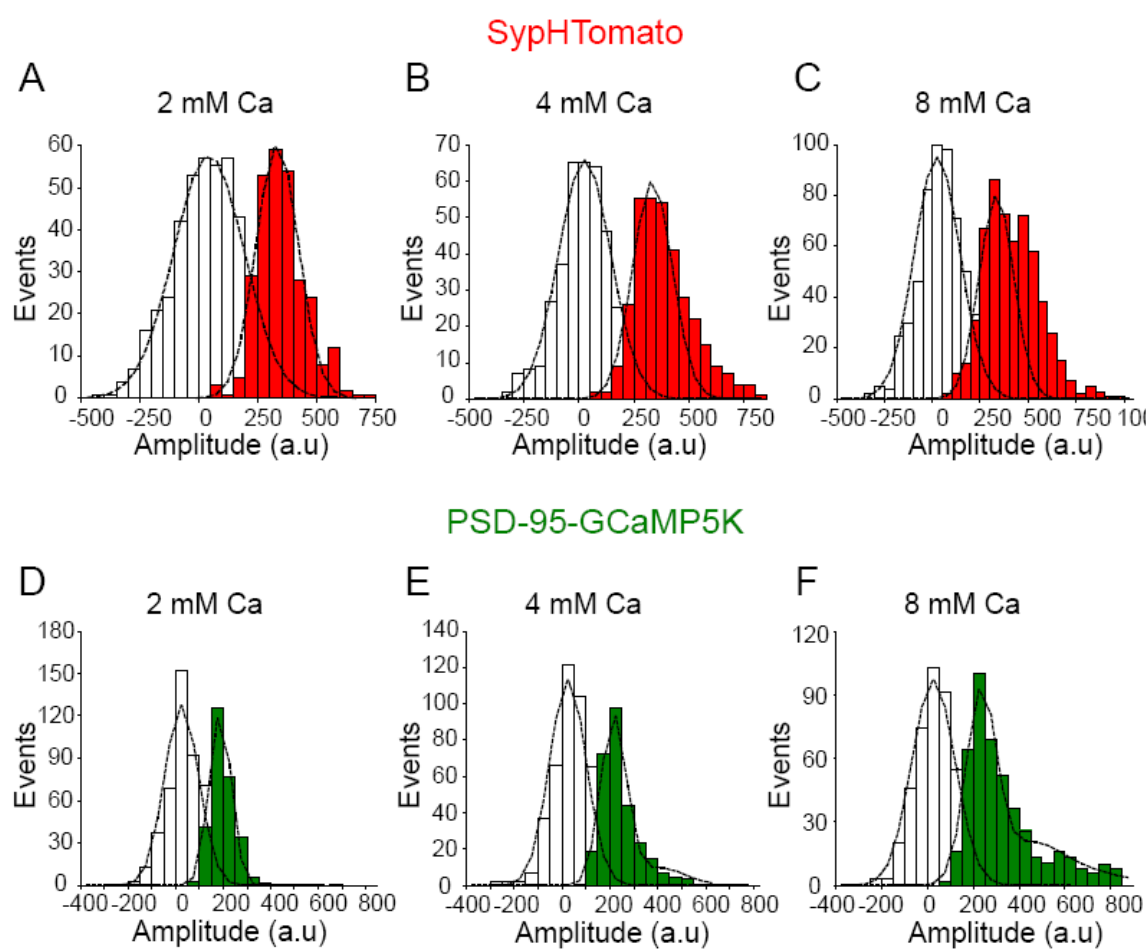

**Figure 3 Figure Supplement-1. Increasing extracellular  $\text{Ca}^{2+}$  increases amplitude of spontaneous events detected by SypHTomato and PSD-95-GCaMP5K.**
