# Supplementary material for: Fast retrieval and autonomous regulation of single spontaneously recycling synaptic vesicles
Source: eLife journal article supplement (doi:10.7554/elife.03658), 2014-11-21
Supplement: supp [file elife-03658-supp-v1.zip › elife_poa_e03658_Figure_4_figure_supplement_1.pdf]

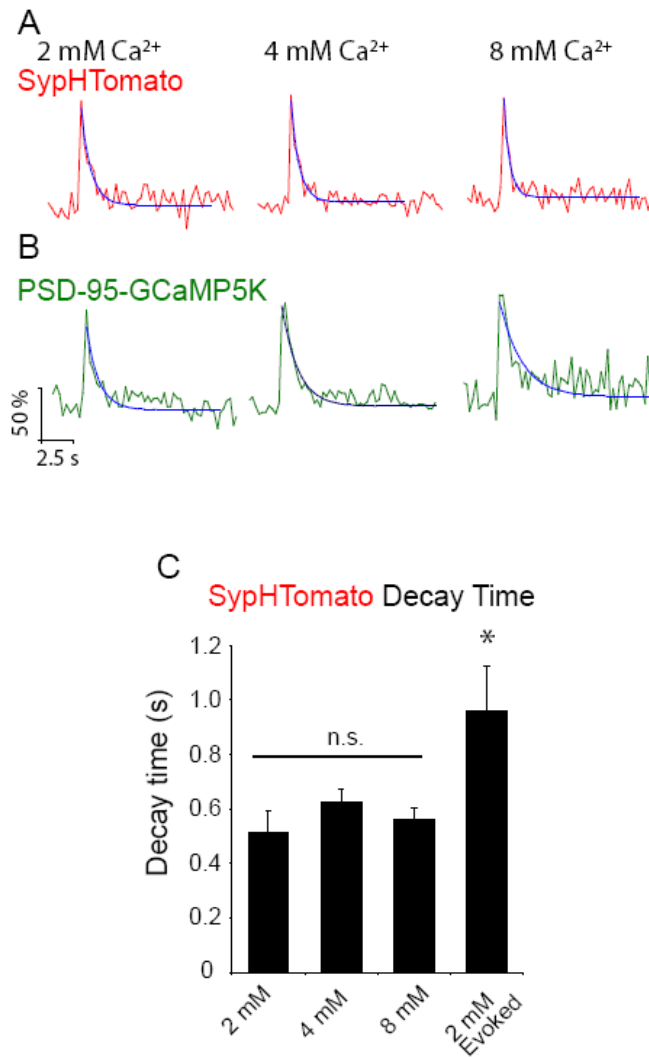

**Figure 4 Figure Supplement-1. Increasing extracellular  $\text{Ca}^{2+}$  does not alter decay time of spontaneous increases in sypHTomato fluorescence.**
